# Supplementary material for: Dos nuevos servicios de educación no formal
Source: Royal Society of Chemistry journal article supplement (doi:10.1039/d1ra08538g), 1995-01-01
Supplement: d1ra08538g1.pdf [file d1ra08538g1.pdf]

Supporting Information

# Cross-linked $\beta$ -CD-CMC as an effective aqueous binder for silicon-based anode in rechargeable lithium-ion batteries

Hao-wen Jiang <sup>a</sup>, Yan Yang <sup>a</sup>, Yi-ming Nie <sup>a</sup>, Zhi-fang Su <sup>a</sup>, Yun-fei Long <sup>a</sup>, Yan-xuan Wen <sup>a,b</sup> and Jing Su\*<sup>a</sup>

\* Corresponding authors

<sup>a</sup> School of Chemistry and Chemical Engineering, Guangxi University, Nanning, Guangxi, China. E-mail: [sujing@gxu.edu.cn](mailto:sujing@gxu.edu.cn)

<sup>b</sup> Guangxi Key Laboratory of Processing for Non-ferrous Metallic and Featured Materials, Guangxi University, Nanning, China

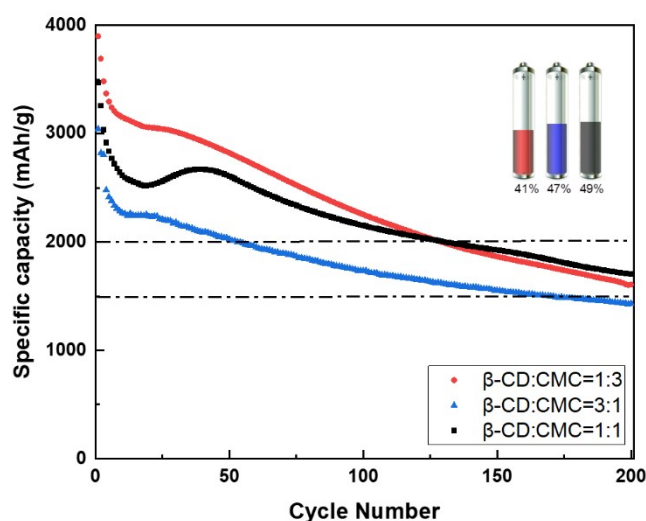

Fig. S1 The cross-linking ratio of  $\beta$ -CD to CMC on the electrochemical performance

The effect of the cross-linking ratio of  $\beta$ -CD to CMC on the electrochemical performance of the electrode is shown in Fig. S1). The binders synthesized with  $\beta$ -CD excess and CMC excess were compared with the samples synthesized in equal amounts, respectively. The results show that the electrode exhibits the characteristics of a pure CMC electrode when there is an excess of CMC, with the electrode having the highest initial capacity. When there is an excess of  $\beta$ -CD the electrode exhibits the characteristics of pure  $\beta$ -CD, with a low initial capacity but a gentle trend of capacity decay. Their capacity retention rates were 41%, 47% and 49% respectively. The equal

synthesized samples have the highest capacity retention and a gentle capacity decay trend.
